# Supplementary material for: ED-B-Containing Isoform of Fibronectin in Tumor Microenvironment of Thymomas: A Target for a Theragnostic Approach
Source: MDPI journal article supplement (doi:10.3390/cancers14112592), 2022-05-24
Supplement: s1 [file s1]

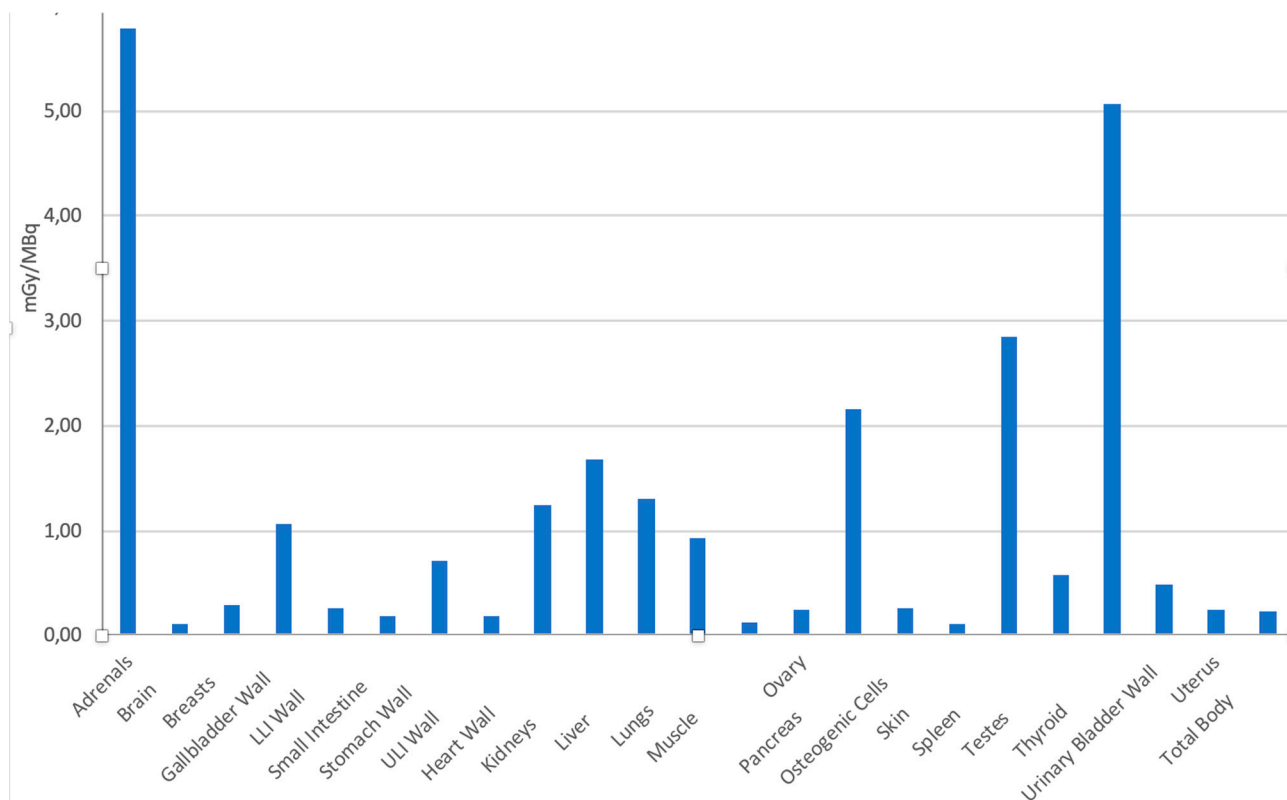

**Supplementary Figure S1.** Average estimated absorbed doses of beta radiation to healthy organs calculated by Olinda.

AMt

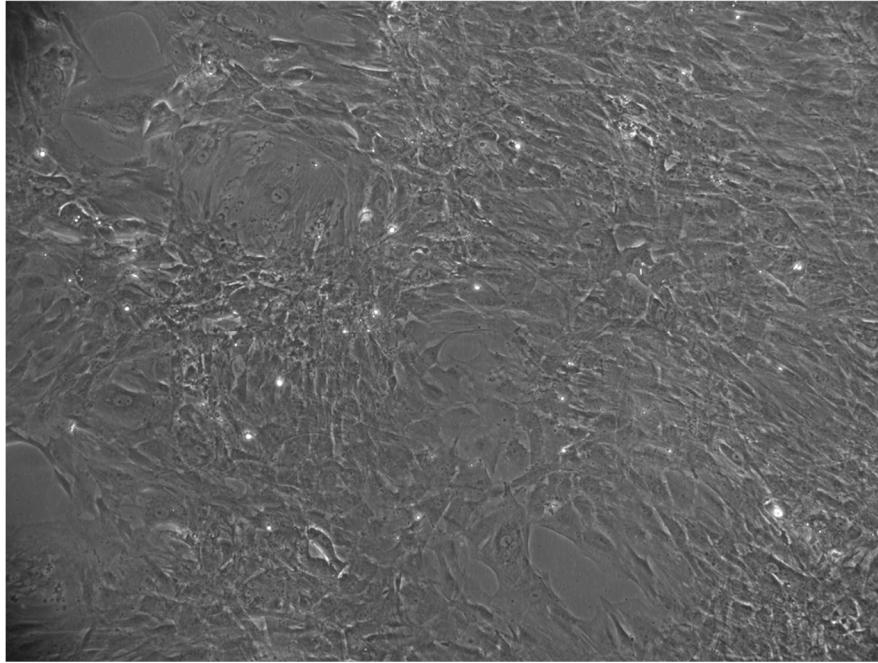

NF

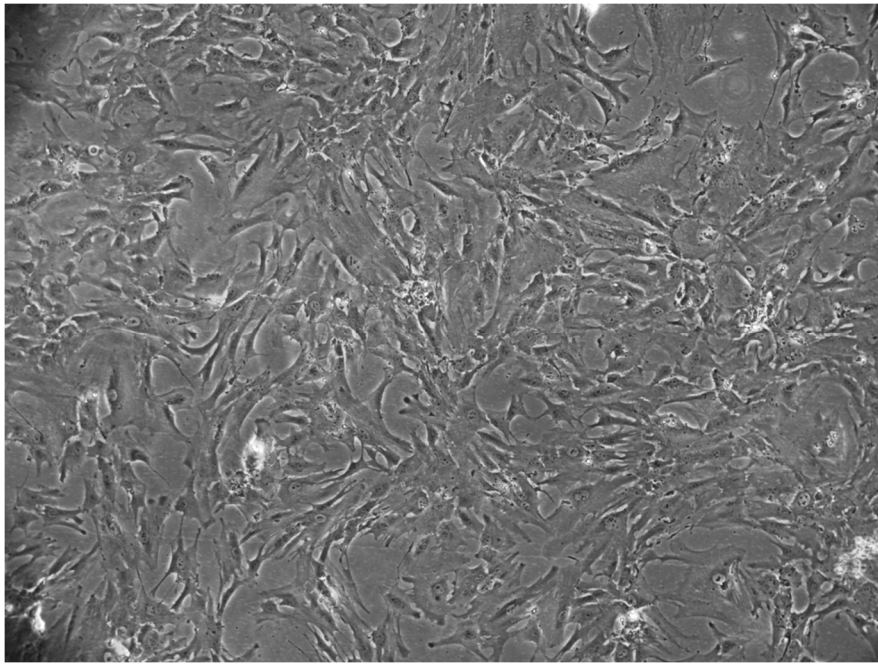

**Figure S2:** Morphology of AMt and NF primary cell culture at passage 1. Pictures were taken by phase contrast microscopy.

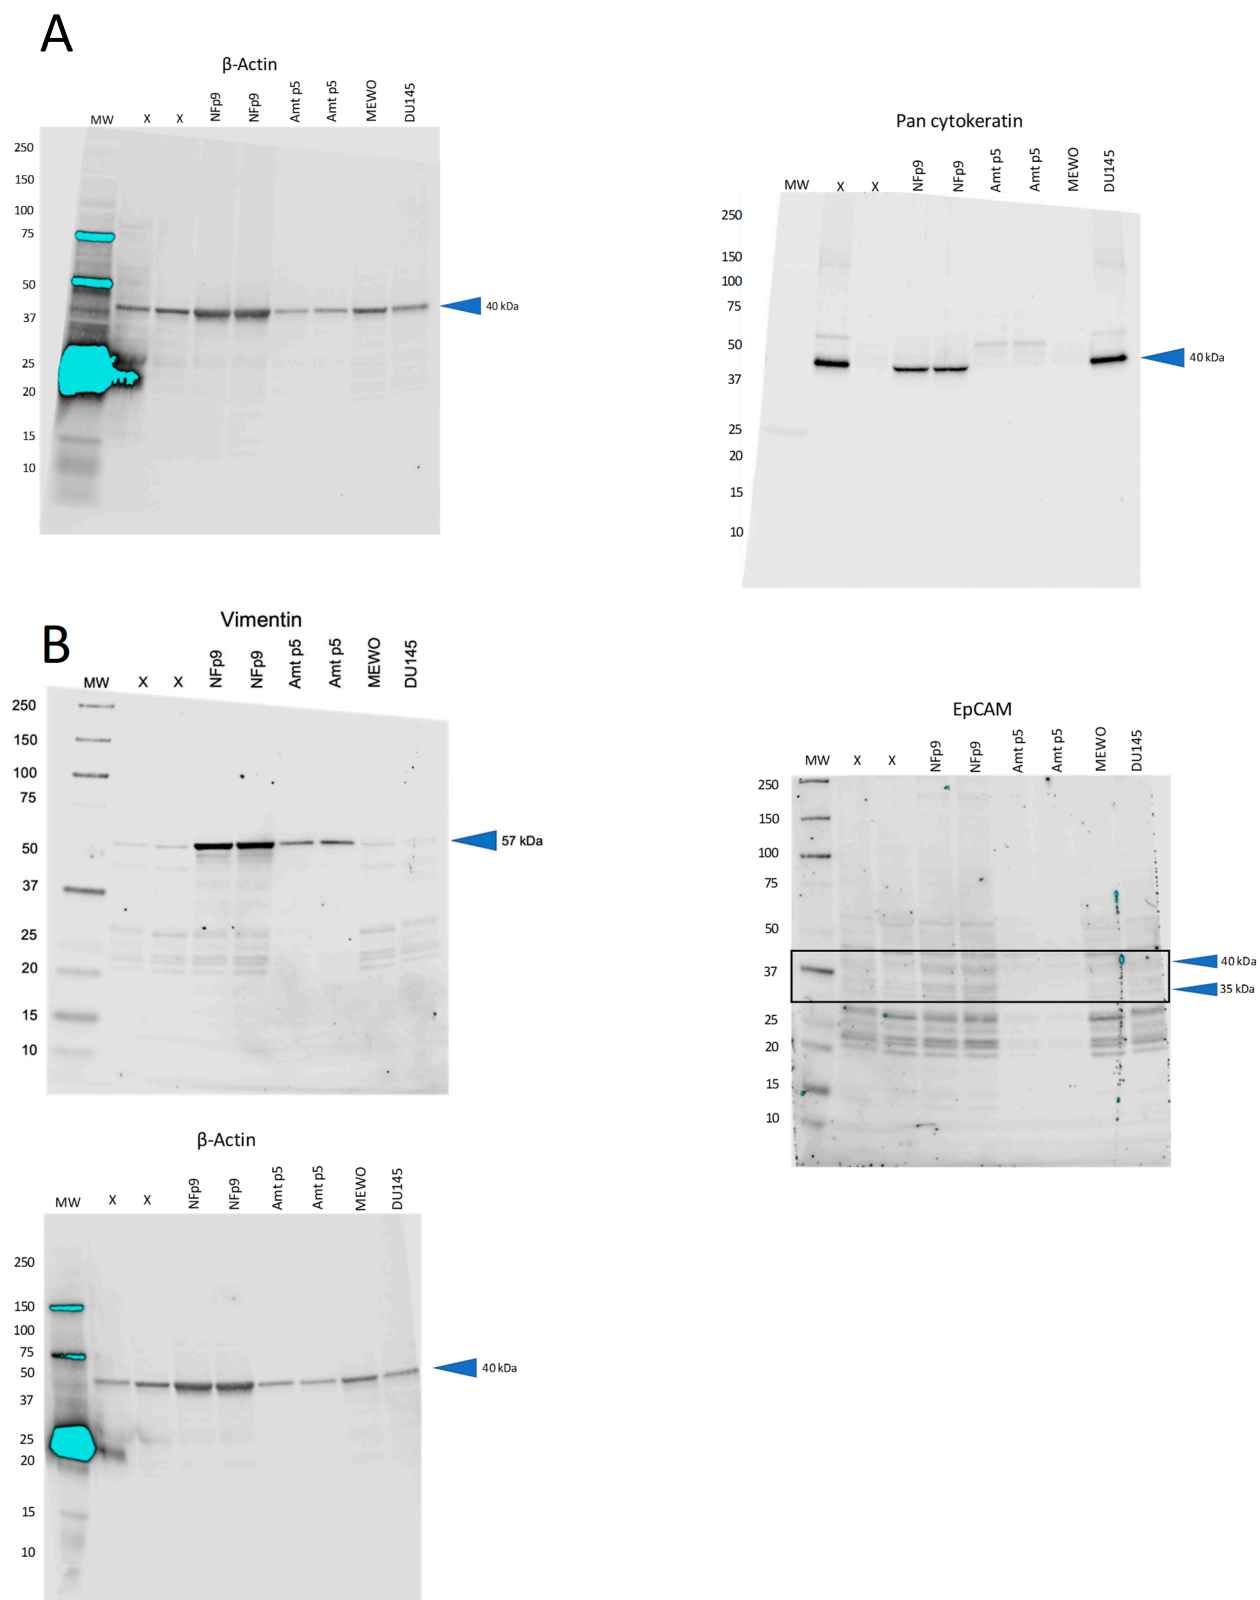

**Supplementary Figure S3 – Western blotting evaluation of EpCAM, Vimentin and Pan cytokeratins expression in NF and AMt cells.**

(A) Western blotting was performed using anti-Pan cytokeratin primary antibody (Abcam, Cambridge, UK) 1:300, anti-Vimentin (Cell Signaling Technology, Massachussets, USA) 1:1000 and Rhodamine anti-Actin (Biorad, Hercules, California, USA) 1:2500 as housekeeping protein. Results confirmed Vimentin expression in NF and AMt cells, whereas Pan cytokeratins expression was confirmed in NF cells only. (B) Western blotting did not reveal any expression of EpCAM in the evaluated cells (see box marked in black colour). Anti-EpCAM (Abcam, Cambridge, UK) 1:1000 primary antibody

and Rhodamine anti-Actin (Biorad, Hercules, California, USA) 1:2500 was used. DU145 and MEWO cell lines were used as controls.

X: samples not included in the evaluation

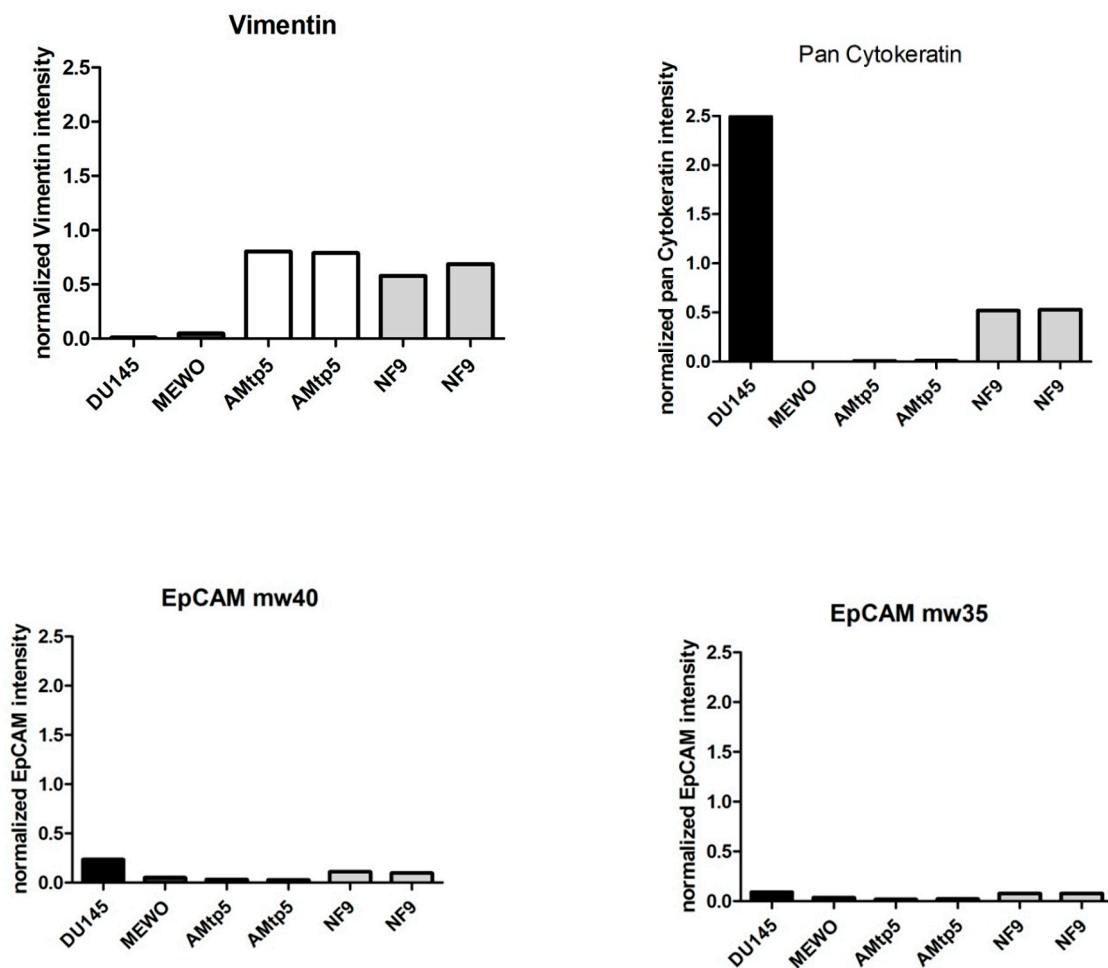

**Supplementary Figure S4 – Densitometry analysis of EpCAM, Vimentin and Pan cytokeratins expression in NF and AMt cells.** Adjusted intensity volumes were normalized referring to  $\beta$ -Actin values using ImageLab software (Biorad).

**Supplemental Table S1.** Patients' baseline characteristics

| All Patients                                                        |            |
|---------------------------------------------------------------------|------------|
| n = 11                                                              |            |
| Median age, years - range                                           | 53 (32-63) |
| Gender                                                              |            |
| Male                                                                | 9          |
| Female                                                              | 2          |
| Tumor stage at diagnosis, Masaoka*                                  |            |
| I                                                                   | 1          |
| II                                                                  | 0          |
| III                                                                 | 1          |
| IV                                                                  | 8          |
| Previous therapy                                                    |            |
| Surgery                                                             | 7          |
| Intracavitary hyperthermic chemoteraphy                             | 3          |
| Chemotherapy, n > 3                                                 | 4          |
| Radiotherapy                                                        | 5          |
| Somatostatin analougues                                             | 11         |
| *In one patient both tumor stage and histological type were unknown |            |

**Supplemental Table S2.** calculated dosimetric estimates for target lesion(s) and bone marrow

| Pt    | Target lesion           |                         |                        | Bone Marrow             |                        |
|-------|-------------------------|-------------------------|------------------------|-------------------------|------------------------|
|       | Side                    | Adsorbed dose (mSv/MBq) | Provisional dose (Gy)* | Adsorbed dose (mSv/MBq) | Provisional dose (Gy)* |
| 44014 | Liver                   | 1.78                    | 5.99                   | 0.172                   | 0.57                   |
| 44026 | Pleura                  | 8.1                     | 44.95                  | 0.103                   | 0.57                   |
| 44031 | Liver                   | 0.2                     | 1.11                   | 0.167                   | 0.93                   |
| 44032 | Pleura                  | 0.6                     | 3.33                   | 0.0939                  | 0.52                   |
| G004  | Liver                   | 7.2                     | 58.32                  | 0.2                     | 1.63                   |
| G007  | Thymic lodge            | 9.8                     | 102.3                  | 0.308                   | 2.6                    |
| G016  | Thymic lodge            | 18.7                    | 192.98                 | 0.255                   | 2.36                   |
| G025  | Liver                   | 1.8                     | 16.98                  | 0.369                   | 3.48                   |
|       | Liver                   | 1.7                     | 16.04                  |                         |                        |
| G030  | Paratracheal lymph node | 0.3                     | 2.34                   | 0.331                   | 2.58                   |
| SW    | Xx                      | Xx                      | Xx                     | Xx                      | xx                     |
| CS    | Pleura                  | Xx                      | Xx                     | Xx                      | xx                     |

\* Calculated for the effective administered activity for treated patients, and for the hypothetical administered activity for untreated patients based on cohort RIT.
